# Supplementary material for: Reverse transcription recombinase polymerase amplification-lateral flow assay for detection of pathogenic orthoflaviviruses in mosquito vectors
Source: PeerJ. 2025 Aug 26;13:e19820. doi: 10.7717/peerj.19820 (PMC12396212; doi:10.7717/peerj.19820)
Supplement: Supplemental Information 2 [file peerj-13-19820-s002.xls]

## Sheet: Sheet1
ITEM TO CHECK	IMPORTANCE	CHECKLIST	line number/Figure/Section
EXPERIMENTAL DESIGN
Definition of experimental and control groups	E	L.214
Number within each group	E	L.215
Assay carried out by core lab or investigator's lab?	D	L.120
Acknowledgement of authors' contributions	D	Contribution list
SAMPLE
Description	E	L.158
Volume/mass of sample processed	D	L.158
Microdissection or macrodissection	E	L.159
Processing procedure	E	L.159
If frozen - how and how quickly?	E	L.159
If fixed - with what, how quickly?	E	Not applicable
Sample storage conditions and duration (especially for FFPE samples)	E	L.159
NUCLEIC ACID EXTRACTION
Procedure and/or instrumentation	E	L.161-170
Name of kit and details of any modifications	E	L.162
Source of additional reagents used	D	Not applicable
Details of DNase or RNAse treatment	E	L.171
Contamination assessment (DNA or RNA)	E	L.235
Nucleic acid quantification	E	L.244
Instrument and method	E	L.244
Purity (A260/A280)	D	No
Yield	D	No
RNA integrity method/instrument	E	Samples quality was check by nanodrop and gel electrophoresis.
RIN/RQI or Cq of 3' and 5' transcripts	E
Electrophoresis traces	D
Inhibition testing (Cq dilutions, spike or other)	E	No
REVERSE TRANSCRIPTION
Complete reaction conditions	E	L.228-233
Amount of RNA and reaction volume	E	Yes
Priming oligonucleotide (if using GSP) and concentration	E	Yes
Reverse transcriptase and concentration	E	Yes
Temperature and time	E	Yes
Manufacturer of reagents and catalogue numbers	D	Yes
Cqs with and without RT	D*	Yes
Storage conditions of cDNA	D	Yes
qPCR TARGET INFORMATION
If multiplex, efficiency and LOD of each assay.	E	Not applicable
Sequence accession number	E	L.212-213
Location of amplicon	D	Table S1
Amplicon length	E	Table S1
In silico specificity screen (BLAST, etc)	E	Table S5-S6
Pseudogenes, retropseudogenes or other homologs?	D	No
Sequence alignment	D	Figure 1
Secondary structure analysis of amplicon	D	No
Location of each primer by exon or intron (if applicable)	E	Not applicable
What splice variants are targeted?	E	Not applicable
qPCR OLIGONUCLEOTIDES
Primer sequences	E	Table S1-S2
RTPrimerDB Identification Number	D	No
Probe sequences	D**	Table S1
Location and identity of any modifications	E	Table S1 and S3
Manufacturer of oligonucleotides	D	L.130, 149
Purification method	D	L.130, 149
qPCR PROTOCOL
Complete reaction conditions	E	L.218-224
Reaction volume and amount of cDNA/DNA	E	L.211-213
Primer, (probe), Mg++ and dNTP concentrations	E	L.211-213
Polymerase identity and concentration	E	L.211-213
Buffer/kit identity and manufacturer	E	L.210
Exact chemical constitution of the buffer	D	No
Additives (SYBR Green I, DMSO, etc.)	E	L.210
Manufacturer of plates/tubes and catalog number	D	L.224
Complete thermocycling parameters	E	L.218-225
Reaction setup (manual/robotic)	D	L.211
Manufacturer of qPCR instrument	E	L.209
qPCR VALIDATION
Evidence of optimisation (from gradients)	D	No
Specificity (gel, sequence, melt, or digest)	E	Figure S1-S2
For SYBR Green I, Cq of the NTC	E	Figure S1-S2
Standard curves with slope and y-intercept	E	Figure S1
PCR efficiency calculated from slope	E	Figure S1
Confidence interval for PCR efficiency or standard error	D	Figure S1
r2 of standard curve	E	Figure S1
Linear dynamic range	E	Figure S1
Cq variation at lower limit	E	Figure S1
Confidence intervals throughout range	D	Figure S1
Evidence for limit of detection	E	Figure S1
If multiplex, efficiency and LOD of each assay.	E	Not applicable
DATA ANALYSIS
qPCR analysis program (source, version)	E	L.223
Cq method determination	E	L.223
Outlier identification and disposition	E	L.223
Results of NTCs	E	Figure S1-S2
Justification of number and choice of reference genes	E	Not applicable
Description of normalisation method	E	Not applicable
Number and concordance of biological replicates	D	Figure 3, S1-S2
Number and stage (RT or qPCR) of technical replicates	E	Figure S1-S2
Repeatability (intra-assay variation)	E	Figure S1
Reproducibility (inter-assay variation, %CV)	D	No
Power analysis	D	No
Statistical methods for result significance	E	Figure S1
Software (source, version)	E	L.223
Cq or raw data submission using RDML	D	No
Table 1. MIQE checklist for authors, reviewers and editors. All essential information (E) must be submitted with the manuscript. Desirable
information (D) should be submitted if available. If using primers obtained from RTPrimerDB, information on qPCR target, oligonucleotides,
protocols and validation is available from that source.
*: Assessing the absence of DNA using a no RT assay is essential when first extracting RNA. Once the sample has been validated as
RDNA-free, inclusion of a no-RT control is desirable, but no longer essential.
**: Disclosure of the probe sequence is highly desirable and strongly encouraged. However, since not all commercial pre-designed assay
vendors provide this information, it cannot be an essential requirement. Use of such assays is advised against.
